# Supplementary material for: Low-temperature synergistic effect of MA and Cl towards high-quality α-FAPbI3 films for humid-air-processed perovskite solar cells
Source: Royal Society of Chemistry journal article supplement (doi:10.1039/d3dt02051g), 2023-09-05
Supplement: d3dt02051g1.pdf [file d3dt02051g1.pdf]

## Supplementary Information

# Low-temperature synergistic effect of MA and Cl towards high-quality $\alpha$ -FAPbI<sub>3</sub> films for humid-air-processed perovskite solar cells

Hao Gao\*, Minghui Zhang, Zicong Xu, Yichuan Chen, Yuehui Hu, Zhijie Yi, Jiayu Huang, Hua Zhu

School of Mechanical and Electronic Engineering, Jingdezhen Ceramic University, Jiangxi 333403, China

\*Corresponding author: Hao Gao.

E-mail address: 002677@jcu.edu.cn.

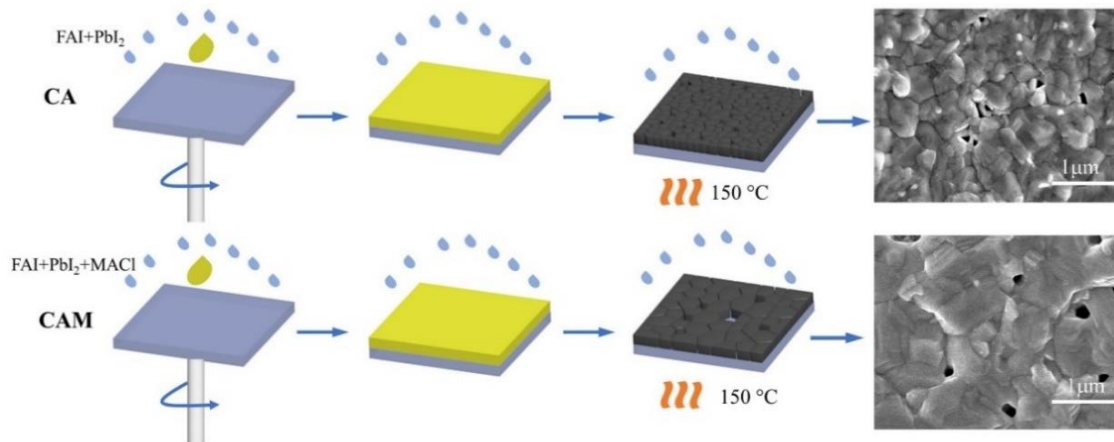

**Figure S1.** Schematic of experimental procedures (left) and scanning electron microscopy (SEM) patterns (right) for CA and CAM films.

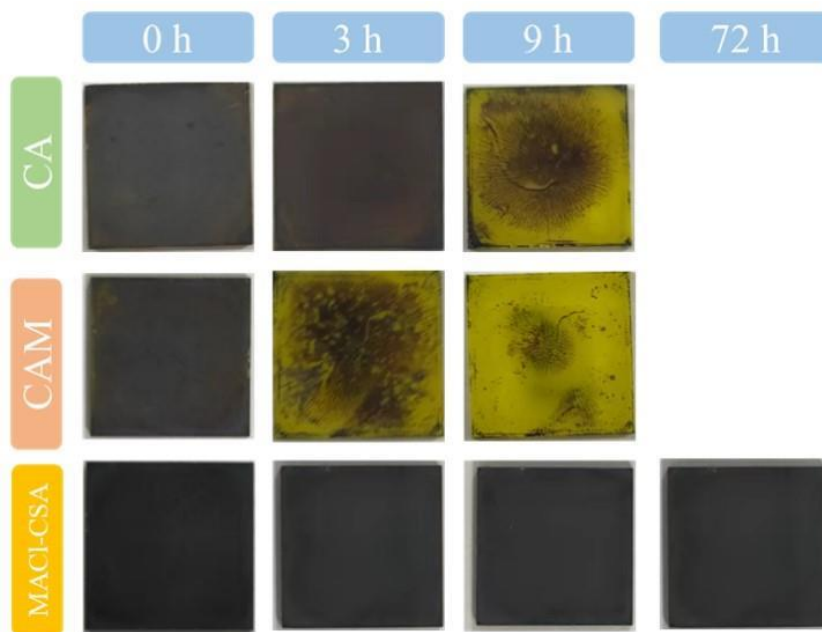

**Figure S2.** Photographs of CA, CAM, and MACl-CSA films exposed in humid air (RH: 60 ± 10%) for different times.

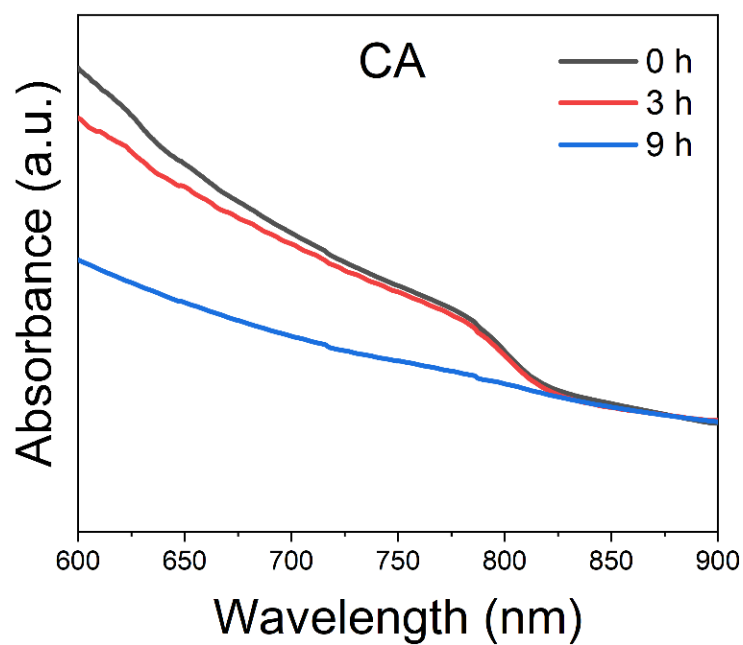

**Figure S3.** UV-vis absorption spectra of CA film exposed in humid air for different times.

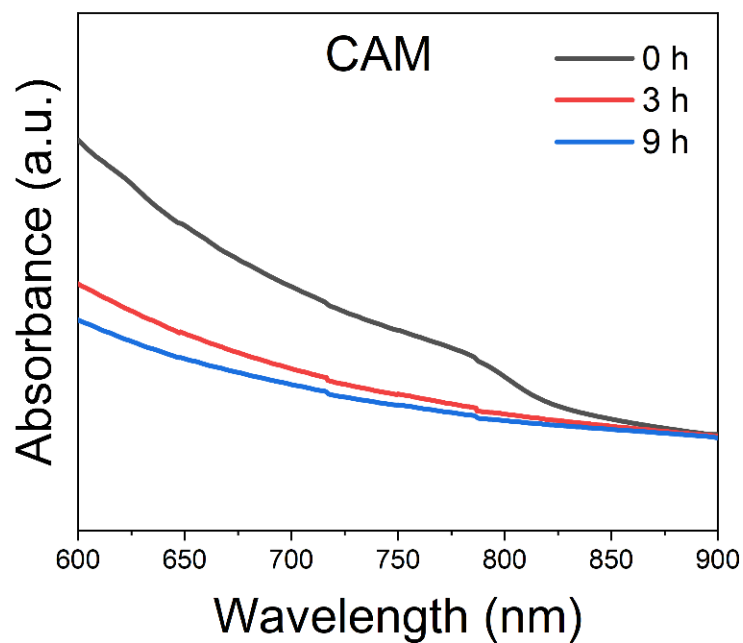

**Figure S4.** UV-vis absorption spectra of CAM film exposed in humid air for different times.

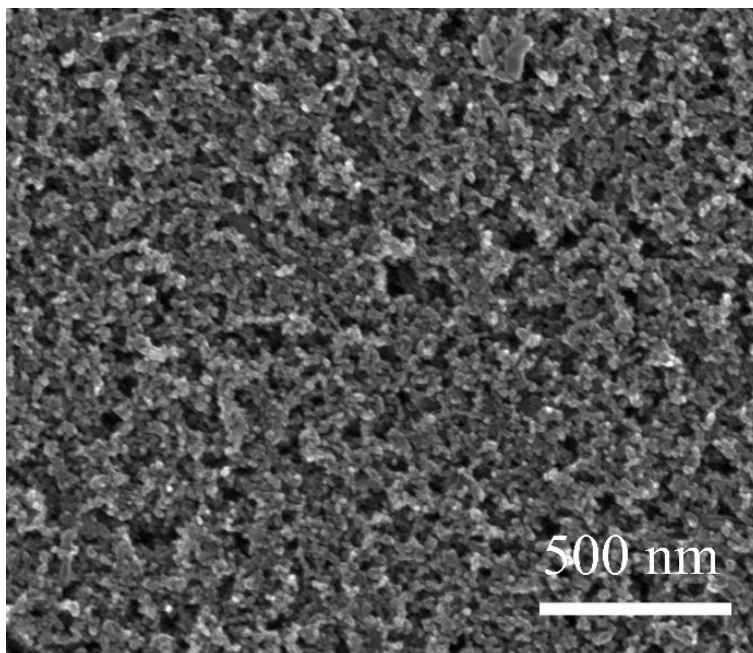

**Figure S5.** Top-view SEM image of the mesoporous TiO<sub>2</sub>.

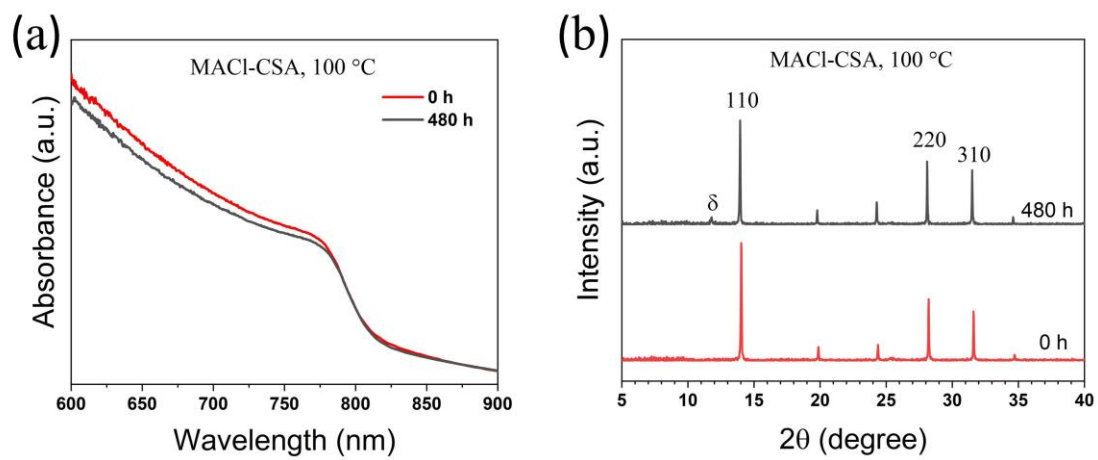

**Figure S6.** (a) UV-vis absorption spectra of MACl-CSA film exposed in humid air for different times. (b) XRD patterns of MACl-CSA film exposed in humid air for different times.

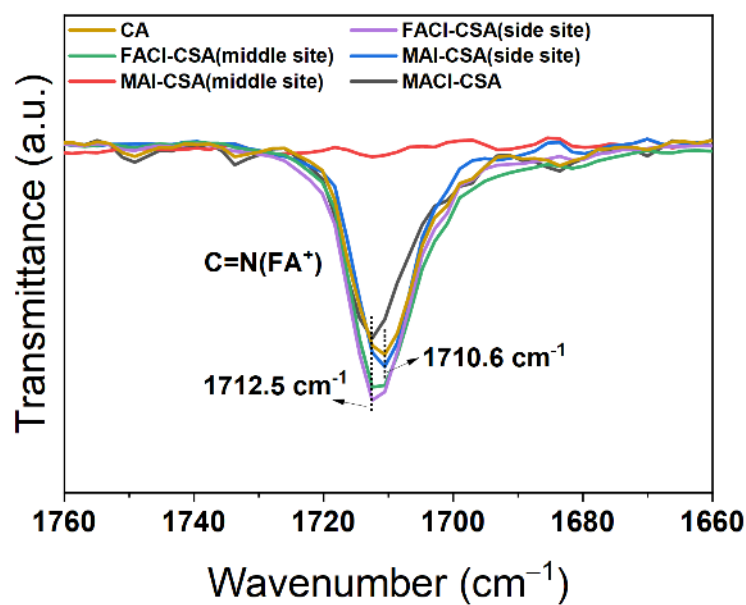

**Figure S7.** FTIR spectra of the CA, MAI-CSA, FACL-CSA, and MACI-CSA perovskite films, which is convenient to compare the intensity of the stretching vibration peak of C=N bond.

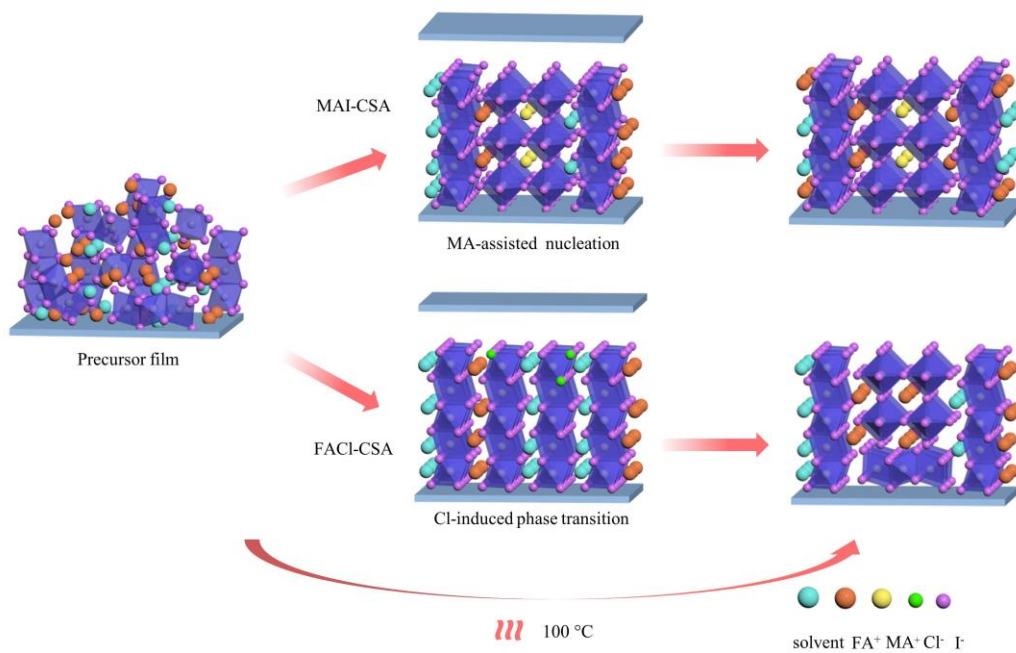

**Figure S8.** Schematic illustration for kinetic mechanism of MAI-CSA film and FACL-CSA film.

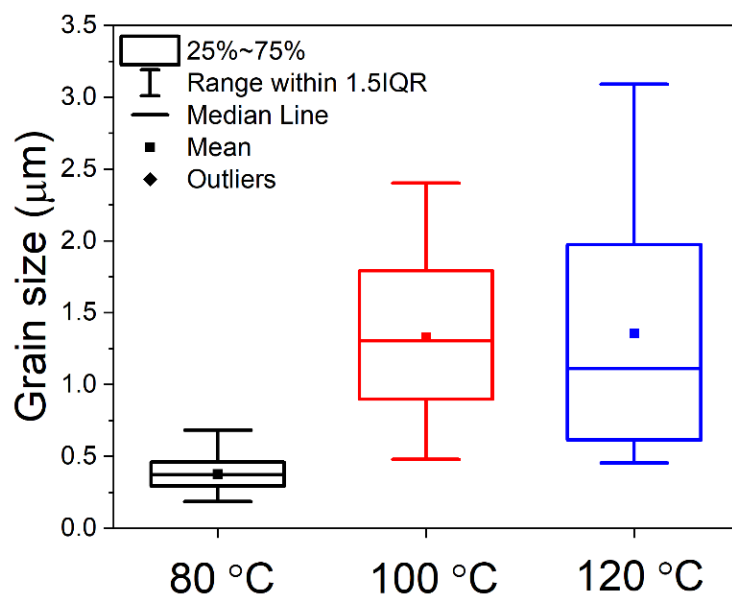

**Figure S9.** Grain size distribution of perovskite films annealed at 80 °C, 100 °C and 120 °C, respectively.

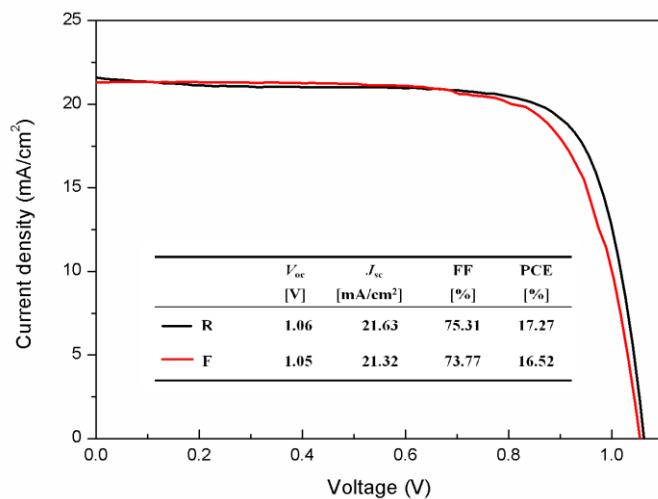

**Figure S10.** J-V curves of the champion device (MACl-CSA-100) measured under AM1.5G 100 mW/cm<sup>2</sup>.

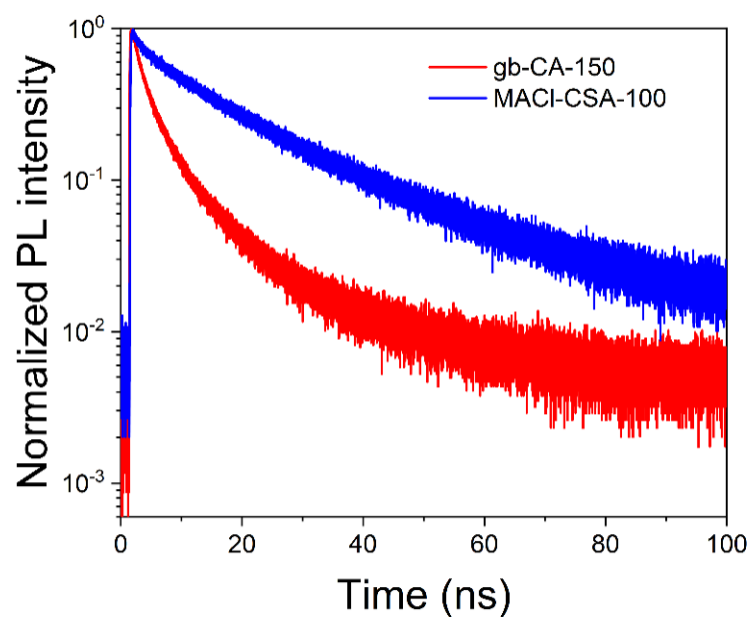

**Figure S11.** Time-resolved photoluminescence decay of gb-CA-150 film and MACl-CSA-100 film.

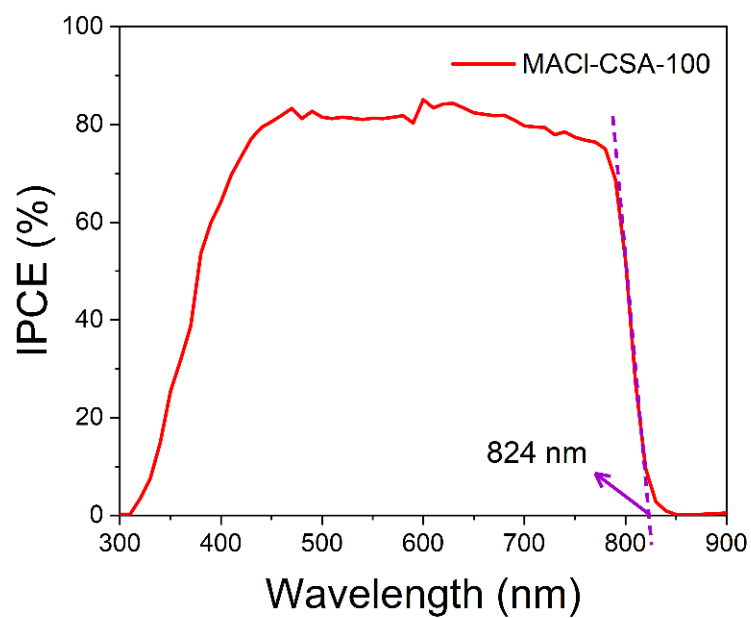

**Figure S12.** The corresponding IPCE spectra of the PSCs employing MACl-CSA-100 film.

**Table S1.** The parameters of the perovskite solar cells employing the gb-CA-150 films.

| gb-CA-150 | $V_{oc}$ [V] | $J_{sc}$ [mA/cm <sup>2</sup> ] | FF [%] | PCE [%] |
|-----------|--------------|--------------------------------|--------|---------|
| 1         | 0.98         | 20.49                          | 72.98  | 14.65   |
| 2         | 0.98         | 20.53                          | 73.05  | 14.70   |
| 3         | 0.99         | 20.54                          | 73.08  | 14.86   |
| 4         | 1.00         | 20.56                          | 73.12  | 15.03   |
| 5         | 1.01         | 20.61                          | 73.22  | 15.24   |
| 6         | 1.01         | 20.62                          | 73.24  | 15.25   |
| 7         | 1.01         | 20.66                          | 73.33  | 15.30   |
| 8         | 1.02         | 20.68                          | 73.36  | 15.47   |
| 9         | 1.02         | 20.69                          | 73.38  | 15.49   |
| 10        | 1.03         | 20.72                          | 73.44  | 15.67   |
| 11        | 1.01         | 20.60                          | 73.20  | 15.23   |
| 12        | 1.02         | 20.65                          | 73.30  | 15.44   |
| 13        | 1.02         | 20.67                          | 73.34  | 15.46   |
| 14        | 1.01         | 20.57                          | 73.16  | 15.19   |
| 15        | 1.03         | 20.71                          | 73.41  | 15.66   |
| 16        | 0.99         | 20.53                          | 73.06  | 14.85   |
| 17        | 0.98         | 20.51                          | 73.02  | 14.68   |
| 18        | 0.97         | 20.44                          | 72.88  | 14.45   |
| 19        | 1.01         | 20.65                          | 73.26  | 15.28   |
| 20        | 1.00         | 20.58                          | 73.16  | 15.06   |



**Table S2.** The parameters of the perovskite solar cells employing the MACl-CSA-100 films.

| MACl-CSA-100 | $V_{oc}$ [V] | $J_{sc}$ [mA/cm <sup>2</sup> ] | FF [%] | PCE [%] |
|--------------|--------------|--------------------------------|--------|---------|
| 1            | 1.04         | 21.53                          | 75.21  | 16.84   |
| 2            | 1.05         | 21.52                          | 75.21  | 16.99   |
| 3            | 1.05         | 21.57                          | 75.25  | 17.04   |
| 4            | 1.04         | 21.52                          | 75.2   | 16.83   |
| 5            | 1.06         | 21.61                          | 75.29  | 17.25   |
| 6            | 1.05         | 21.58                          | 75.26  | 17.05   |
| 7            | 1.05         | 21.62                          | 75.28  | 17.08   |
| 8            | 1.02         | 21.45                          | 75.13  | 16.44   |
| 9            | 1.04         | 21.54                          | 75.22  | 16.85   |
| 10           | 1.05         | 21.59                          | 75.27  | 17.06   |
| 11           | 1.04         | 21.48                          | 75.16  | 16.79   |
| 12           | 1.06         | 21.62                          | 75.30  | 17.26   |
| 13           | 1.02         | 21.43                          | 75.11  | 16.42   |
| 14           | 1.06         | 21.63                          | 75.31  | 17.28   |
| 15           | 1.03         | 21.47                          | 75.15  | 16.62   |
| 16           | 1.03         | 21.49                          | 75.17  | 16.64   |
| 17           | 1.05         | 21.56                          | 75.24  | 17.03   |
| 18           | 1.05         | 21.60                          | 75.28  | 17.07   |
| 19           | 1.04         | 21.51                          | 75.19  | 16.82   |
| 20           | 1.06         | 21.63                          | 75.30  | 17.27   |
